# Supplementary material for: Modeling volatilization and adsorption of disinfection byproducts in natural watersheds
Source: Royal Society of Chemistry journal article supplement (doi:10.1039/c2em30617d), 2012-01-01
Supplement: c2em30617d.pdf [file c2em30617d.pdf]

**Supplementary Information**

**Modeling Volatilization and Adsorption of Disinfection Byproducts in Natural  
Watersheds**

**Wenbiao Jin<sup>1†</sup>, Jin Zhou<sup>2†</sup>, Baiyang Chen<sup>1\*</sup>, Xiaoshan Zhu<sup>2\*</sup>**

<sup>1</sup>Department of Civil & Environmental Engineering, Harbin Institute of Technology  
Shenzhen Graduate School, Shenzhen, Guangdong Province, P.R. China, 518055.

<sup>2</sup>Division of Ocean Science & Technology, Graduate School at Shenzhen, Tsinghua  
University, Shenzhen, P.R. China, 518055.

<sup>\*</sup>: Corresponding author Tel: +86-134-80727605, email: polar\_chen@hotmail.com.

<sup>†</sup>: These authors contributed equally to this work

## General Model Framework

The governing fate-and-transport model simulates a continuous input, point sourced, steady state watershed (Equation 1)<sup>1</sup>. The model is able to accounting for the effects of dilution (e.g., unknown inflow), condensation (e.g., water evaporation), advection, dispersion, transformation, and degradation among liquid, solid, and air interfaces. In general, it predicts the content of DBP as a function of travel distance (x) and time (t).

$$V \frac{d[DBP]}{dt} = [DBP]_{in\_WWTP} \cdot Q_{in\_WWTP} + [DBP]_{in\_upstream} \cdot Q_{in\_upstream} - Q_{out} \cdot [DBP] - V \cdot U_{water} \cdot \frac{d[DBP]}{dx} + V \cdot E_x \frac{d^2[DBP]}{dx^2} + r_T \cdot V \quad 1$$

Where [DBP] represents the concentration of a DBP (mole/L); t refers to the time (hr); Q is the water flow rate (m<sup>3</sup>/hr); U<sub>water</sub> is the flow velocity in the flow direction (x-direction) caused by advection (m/hr); E<sub>x</sub> is the dispersive coefficient in the x direction (m<sup>2</sup>/hr); x is the travel distance (m); r<sub>T</sub> is the total loss rate of DBP (mole/L-hr); V is the volume of a given watershed (m<sup>3</sup>). The subscript “in” indicates the inflows from WWTP and upstream; and “out” indicates the outflow from the body of water.

In one cross-section or a specific point where the contaminant inflow DBP content equals to the outflow DBP content, Equation 1 can be simplified as the following way<sup>2</sup>:

$$\frac{d[DBP]}{dt} = r_T - U_{water} \cdot \frac{d[DBP]}{dx} + E_x \frac{d^2[DBP]}{dx^2} \quad 2$$

40

41 Overall, the levels of DBP removal are affected by the degradation/transformation  
42 processes (the first term,  $r_T$ ), advection (the second term), and dispersion (the third term).  $r_T$   
43 determines the fates of the DBPs in the watershed, and  $U_{water}$  and  $E_x$  decide the transport  
44 and spreading of the DBPs<sup>2</sup>.  $r_T$  is the sum of a variety of DBP loss rates including  
45 volatilization ( $r_V$ ), photolysis ( $r_P$ ), hydrolysis ( $r_H$ ), biodegradation ( $r_B$ ), adsorption ( $r_A$ ), and  
46 others ( $r_O$ ) (Equation 3).

47

$$r_T = r_V + r_P + r_H + r_B + r_A + r_O \quad 3$$

49

50 In this study, emphases were placed on the capacities of  $r_V$  and  $r_A$ . Because loss rate is  
51 usually described as a pseudo first-order reaction, the reduction rate of a DBP is a function  
52 of its first-order rate constant ( $k_T$ ) and concentration (Equation 4).

53

$$r_T = \frac{d[DBP]}{dt} = -k_T \cdot [DBP] \quad 4$$

55

56 DBP half-life ( $T_{1/2}$ ) is calculated by  $k_T$  and is irrelevant to the initial concentrations of DBP  
57 (Equation 5), which makes the data comparable across different labs and different types of  
58 compounds.

59

$$T_{1/2} = \frac{\ln(2)}{k_T} \quad 5$$

61

62 The determination of the water flow velocity ( $U_{\text{water}}$ ) in surface watersheds follows

63 Manning's equation:

64

$$U_{\text{water}} = \frac{R_H^{2/3} \cdot S^{1/2}}{n} \quad 6$$

66

67 Where  $R_H$  is the hydraulic radius (m) of the watershed, calculated as the cross-sectional

68 area ( $A$ ,  $\text{m}^2$ ) divided by the wetted perimeter ( $P$ , m);  $S$  is the hydraulic gradient or slope of

69 the watershed (unitless); and  $n$  refers to the roughness coefficient of the watershed

70 ( $\text{hr}/\text{m}^{1/3}$ ).

71

72 For groundwater, the flow velocity of the water is determined by Darcy's law:

73

$$U_{\text{water}} = k_C \cdot S = k_C \cdot \frac{dH}{dx} \quad 7$$

75

76 Where  $k_C$  indicates the hydrological conductivity (m/hr) and  $H$  indicates the height from

77 the start to the end point.

78

79 Based on an empirical equation<sup>3</sup>, the longitudinal dispersive coefficient  $E_x$  in the surface

80 watershed is associated with certain hydrogeological characteristics, as presented below:

81

82 
$$E_x = 3.4 \cdot 10^{-5} \cdot \frac{U_{water}^2 \cdot W^2}{H \cdot U_{shear}}$$
 8

83

84 Where W means the width of the watershed (m) and  $U_{shear}$  refers to the shear velocity  
85 (m/hr), which can be estimated by the following equation:

86

87 
$$U_{shear} = (g \cdot H \cdot S)^{1/2}$$
 9

88

89 Where g is the gravity constant (9.8 m/sec<sup>2</sup>).

90

91 In an aquifer system, there is significant dispersion primarily because of small- and  
92 large-scale mixing phenomena. Dispersivity ( $D_{disp}$ ) dominates the dispersion effect  
93 (Equation 10), and its values range from 0.01 to 0.1 times of the travel distance<sup>4</sup>.

94

95 
$$E_x = D_l + D_{disp} \cdot U_{water}$$
 10

96

97 Where  $D_l$  is the diffusivity for DBP, which is to be discussed in the following section and  
98 usually negligible in groundwater.

99

100 **Volatilization Model Development**

101

102 On the basis of the above-mentioned fate-and-transport model buildup and the

hydrogeological setups, volatilization and adsorption simulations were conducted. According to the classic two-film theory, volatilization refers to the transition of a compound from its liquid phase to its gaseous phase. The transfer rate ( $dc/dt$ ) is associated with the mass-transfer coefficient ( $k_l$ ), the water depth ( $H$ ), and the concentration gradient between gaseous and liquid forms<sup>2</sup>(Equation 11):

$$r_v = \frac{d[DBP]}{dt} = \frac{k_{vol}}{H} \cdot \left( \frac{[DBP]_{gas}}{H_c} - [DBP] \cdot \alpha_0 \right) \quad 11$$

Where  $DBP_{gas}$  is the concentration of DBP in the gaseous phase (mole/L);  $k_{vol}$  is the volatilization rate coefficient (m/hr);  $\alpha_0$  is the fraction of DBP in its non-ionized form (reason: the ionized species bonds strongly with water and therefore has little likelihood of detaching from water and transferring into air);  $H_c$  is the Henry's law constant (HLC) in unitless form, which is equal to:

$$H_c = \frac{H_e}{R \cdot (273 + T)} \quad 12$$

Where  $R$  is a constant ( $8.02 \times 10^{-5}$  atm-m<sup>3</sup>/mole-K);  $T$  is the temperature in degrees Celsius (°C); and  $H_e$  is the HLC in unit of atm-m<sup>3</sup>/mole, which is positively correlated with the increase in temperature (Equation 13).

$$H_{e1} = H_{e2} \cdot e^{\frac{-\Delta H}{R_C} \left( \frac{1}{273+T_1} - \frac{1}{273+T_2} \right)} \quad 13$$

124

125  $H_{e1}$  and  $H_{e2}$  are the HLCs of two different temperatures ( $\text{atm}\cdot\text{m}^3/\text{mole}$ );  $R_C$  is the gas  
126 constant ( $8.314 \text{ J/mole}\cdot\text{K}$ ),  $\Delta H$  is the enthalpy of vaporization ( $\text{KJ/mole}$ ) of a DBP;  $T_1$  and  
127  $T_2$  are temperatures ( $^{\circ}\text{C}$ ).

128

129 In an open system for which gaseous DBP is immediately dispersed, equation 11 can be  
130 simplified to include the aqueous DBP only:

131

$$r_v = \frac{d[\text{DBP}]}{dt} = -\frac{k_{vol}}{H} \cdot [\text{DBP}] \cdot \alpha_0 \quad 14$$

133

134 The non-ionized fraction of a chemical,  $\alpha_0$ , is a function of its acid-base dissociation  
135 constant ( $\text{pK}_a$ ), and calculated by  $\text{pK}_a$  and the hydrogen ion content  $[\text{H}^+]$  in a designated  
136  $\text{pH}^5$ :

137

$$\alpha_0 = \frac{[\text{H}^+]}{[\text{H}^+] + 10^{-\text{pK}_a}} \quad 15$$

139

140 The parameter  $k_{vol}$  is determined by the gas-film exchange coefficient ( $k_{gas}$ ) and the  
141 liquid-film exchange coefficient ( $k_{liquid}$ ), according to the two-film theory (Equation 16):

142

$$k_{vol} = \left( \frac{1}{k_{liquid}} + \frac{1}{k_{gas} \cdot H_C} \right)^{-1} \quad 16$$

The liquid-film exchange coefficient  $k_{\text{liquid}}$  (m/hr) can be further estimated by an empirical equation related to DBP chemical properties<sup>2</sup>:

$$k_{\text{liquid}} = k_{\text{exchange}} \cdot \left(\frac{32}{MW}\right)^{1/4} \quad 17$$

Where  $k_{\text{exchange}}$  is the coefficient of a DBP in exchange with water (m/hr); MW refers to the molecular weight (g/mole).  $k_{\text{exchange}}$  of a DBP can be calculated by its diffusivity ( $D_l$ ), water velocity ( $U_{\text{water}}$ ), and water depth ( $H$ )<sup>2</sup>:

$$K_{\text{exchange}} = \left(D_l \cdot \frac{U_{\text{water}}}{H}\right)^{1/2} \quad 18$$

Where the diffusivity of an organic compound in water ( $D_l$ ) is computed via an equation proposed by USEPA<sup>6</sup>:

$$D_l = 1.518 \cdot 10^{-4} \cdot \left(\frac{T + 273}{298}\right) \cdot \left(\frac{MW}{\rho_{\text{DBP}}}\right)^{-0.6} \quad 19$$

Where  $\rho_{\text{DBP}}$  is the density of DBP.

In terms of the DBP transfer in a gas-film, the coefficient  $k_{\text{gas}}$  mainly depends on DBP diffusivity in gas ( $D_g$ ) and wind velocity ( $U_{\text{wind}}$ )<sup>2</sup>:

$$K_g = 0.001 \cdot \left( \frac{D_g}{\nu_g} \right)^{2/3} \cdot U_{wind} \quad 20$$

167

168 Where  $\nu_g$  is the kinematic viscosity constant of air ( $0.15 \text{ cm}^2/\text{s}$ ). Like  $D_l$ ,  $D_g$  can also be  
169 estimated by the chemical properties of MW, density, and temperature, based on the  
170 following equations (Equations 21 and 22)<sup>6</sup>.

171

$$D_g = \frac{2.29 \cdot 10^{-3} \cdot (T + 273)^{1.5} \cdot \sqrt{0.034 + 1/MW} \cdot 0.4}{((MW / 2.5 / \rho_{DBP})^{1/3} + 1.8)^2} \quad \text{if } (1 - 1.5 \cdot 10^{-5} \cdot MW^2) \leq 0.4 \quad 21$$

$$D_g = \frac{2.29 \cdot 10^{-3} \cdot (T + 273)^{1.5} \cdot \sqrt{0.034 + 1/MW} \cdot (1 - 1.5 \cdot 10^{-5} \cdot MW^2)}{((MW / 2.5 / \rho_{DBP})^{1/3} + 1.8)^2} \quad \text{if } (1 - 1.5 \cdot 10^{-5} \cdot MW^2) > 0.4 \quad 22$$

174

175 Overall, the volatilization rate constant ( $k_{vol}$ ) is determined by approximately twelve  
176 variables, including watershed hydrogeological characteristics ( $U_{water}$ ,  $W$ ,  $H$ ,  $S$ , and  $n$ ),  
177 environmental conditions ( $T$  and  $U_{wind}$ ), and chemical-specific properties ( $HLC$ ,  $pK_a$ ,  $\rho_{DBP}$ ,  
178  $\Delta H$ , and  $MW$ ). By selecting the hydrogeological and environmental settings, estimating the  
179 relative loss of different classes of DBPs becomes possible.

180

## 181 Adsorption Model Development

182

183 Similar to volatilization, the removal of DBPs via adsorption in surface watersheds also  
184 involves two steps: first, DBPs in dissolved forms are partitioned into suspended particles  
185 (SP) coated with organic matter, forming particulate DBPs (Equation 23). Next, the  
186 adsorbed DBPs settle down to the waterbed along with SP via the force of gravity. The first

step decides the adsorptive potentials of the DBPs in the SP, and the second step controls the settling kinetics of the DBPs and SP<sup>7</sup>. The adsorption equilibrium is assumed to be linear, which is true for relatively low concentrations of DBPs (ng/L or µg/L levels) in the environment. The adsorption kinetics are assumed rapid and instantaneous by assigning a high adsorption rate constant ( $k_{\text{sorption}} = 25000/\text{hr}$ ). Sediment comes only from upstream suspended particles (SPs) in a watershed if there are no soil movements, riverbank erosion, or other types of renewal; this assumption serves as the basis of this study. Before SP settles down and becomes sediment, SP adsorbs and equilibrates with DBPs as much/fast as possible, during which SP and DBP have sufficient opportunity in contacting with each other and reaches its adsorption capacity. Once settled, SP, along with the adsorbed DBP, are kept in waterbed and termed sediment. Because the sediment adsorbs DBP already, its adsorption ability is much lower than initial SP, if not zero. In addition, sediment in waterbed is not fully in contact with DBP in water, so its adsorption ability can be compromised. Under such condition, the exchange of DBPs between the water and the waterbed sediment becomes relatively insignificant.

$$\frac{d[DBP_{\text{sorbed}}]}{dt} = k_{\text{sorption}} (K_p \cdot [DBP] - [DBP_{\text{sorbed}}]) \quad 23$$

Where  $K_p$  is the partition coefficient (L/kg) as defined in Equation 24. For a compound with reversible adsorption and desorption,  $K_p$  is estimated by its octanol-water partitioning constant ( $K_{\text{ow}}$ ), SP concentration ( $[SP]$ , mg/L), and the fraction of organic matter ( $f_{\text{oc}}$ ) coated in SP<sup>2</sup>.

209

$$210 \quad K_p = \frac{[DBP_{sorbed}]}{[DBP_{dissolved}]} = \frac{2.8 \cdot f_{OC} \cdot K_{OW}}{1.4 + [SP] \cdot f_{OC} \cdot K_{OW}} \cdot \alpha_0 \quad 24$$

211

212 Where  $\alpha_0$  is the percentage of a specific DBP in non-ionized form (reason: the ionized  
213 species bonds strongly with water and therefore has little likelihood of detaching from  
214 water and absorbing on adsorbent). The particulate and dissolved fractions of DBPs are  
215 calculated with the following equations<sup>2</sup>:

216

$$217 \quad f_p = \frac{K_p \cdot [SP]}{1 + K_p \cdot [SP]} \quad 25$$

$$218 \quad f_d = 1 - f_p \quad 26$$

219

220 Where  $f_p$  is the fraction of DBP in particulate form, or the absorbable fraction (%);  $f_d$  is the  
221 fraction of DBP in dissolved form (%).

222

223 At the second step, SP and DBPs settle simultaneously. Under constant temperature, the  
224 nominal settling velocity of SP is mainly determined by the particle size and the difference  
225 in density between water ( $\rho_{water}$ ) and particle ( $\rho_{particle}$ ), according to Stokes' law (Equation  
226 27):

227

$$228 \quad v_s = \frac{g}{18} \cdot \left( \frac{\rho_{solid} - \rho_{water}}{\mu} \right) \cdot d_i^2 \quad 27$$

229 Where:  $v_s$  is the settling velocity of the suspended particle (m/hr);  $\rho_{solid}$  is the density of

suspended particles ( $\text{g}/\text{cm}^3$ );  $\rho_{\text{water}}$  is the density of water (assumed to be constant at  $1\text{ g}/\text{cm}^3$ );  $d_i$  refers to the diameter of the suspended particle ( $\mu\text{m}$ );  $\mu$  is the viscosity of water at a certain temperature ( $= 0.1\text{ cm}^2/\text{s}$  at  $25\text{ }^\circ\text{C}$ ) and decreases with temperature ( $T$ ); and  $g$  is the gravity acceleration constant ( $9.8\text{ m}/\text{sec}^2$ ). The density of a SP has been shown to roughly correspond with its diameter (Equation 28) in some case studies<sup>2</sup>:

$$\rho_{\text{solid}} = 2 \cdot d_i^{-0.15} \quad 28$$

Overall, the removal of SP follows a first-order reaction rate (Equation 29) in which water depth ( $H$ ) serves as an important factor in determining the SP settling rate<sup>2</sup>. The removal of DBPs also follows a seemingly first-order reaction rate (Equation 30). If a DBP exists primarily in non-ionized form (i.e.,  $\alpha_0=1$ ), the DBP rate can be converted to be Equation 31, in which the reduction rate constant of the DBP ( $k_{\text{settling}}$ ) decreases with the declining SP content (Equation 32).

$$\frac{d[SP]}{dt} = -k_{SP} \cdot [SP] = -\frac{v_s}{H} \cdot [SP] \quad 29$$

$$\frac{d[DBP]}{dt} = -\frac{v_s}{H} \cdot [DBP_p] = -\frac{v_s}{H} \cdot [DBP] \cdot \alpha_0 \cdot f_p \quad 30$$

$$\frac{d[DBP]}{dt} = -\frac{v_s}{H} \cdot [DBP] \cdot \frac{K_p \cdot [SP]}{1 + K_p \cdot [SP]} = -k_{SP} \cdot \frac{K_p \cdot [SP]}{1 + K_p \cdot [SP]} \cdot [DBP] \quad 31$$

$$k_{\text{settling}} = \frac{K_p \cdot [SP]}{1 + K_p \cdot [SP]} \cdot k_{SP} \quad 32$$

Where  $k_{SP}$  is the first-order reduction rate constant ( $1/\text{hr}$ ) of SP.

251

252 Theoretically, the settled DBPs may diffuse into soils, undergoing biodegradation and  
253 hydrolysis in the sediment. These subsequent processes are nonetheless beyond the scope  
254 of this study and therefore are not emphasized.

255

256 In well-confined aquifer, soil occupies most of the space and serves as an absorbent. The  
257 adsorption rate of DBPs on soils also follows Equation 23, but unlike the surface watershed,  
258 the content of particles in aquifer is much larger (in 1,000,000 mg/L level), which is  
259 determined by the product of the particle density ( $\rho_{solid}$ , kg/L) and the aquifer porosity ( $\Phi$ )  
260 (Equations 33 and 34).

261

$$262 \quad \rho_{bulk} = \rho_{solid} \cdot (1 - \phi) \quad 33$$

$$263 \quad [SS] = 10^6 \cdot \rho_{bulk} \quad 34$$

264

265 Because the amount of DBP loss in water is equal to the amount of DBP gain in soil  
266 (Equation 35)<sup>7</sup>, the fate and transport of DBPs in aquifer are influenced by the adsorption  
267 (the first term of Equation 36) and degradation/transformation processes (the second term  
268 of Equation 36)

269

$$270 \quad d[DBP] \cdot V \cdot \phi = d[DBP_{sorbed}] \cdot V \cdot \rho_{solid} \cdot (1 - \phi) \quad 35$$

$$271 \quad \frac{d[DBP]}{dt} = - \frac{d[DBP_{sorbed}]}{dt} \cdot \frac{\rho_{solid} \cdot (1 - \phi)}{\phi} - k_T \cdot [DBP] \quad 36$$

272

Retardation in groundwater systems does not reduce DBPs directly, but provides DBPs with more time to be degraded or transformed by other removal mechanisms. The retardation coefficient ( $R$ ) is defined as the ratio of the volume of water needed to transport a pollutant completely through the aquifer ( $V_{req}$ ) to the unit volume ( $V_{unit}$ , namely pore volume) of the aquifer (Equation 35). In other words, a pollutant may reside ( $R-1$ ) times of period longer than pure water. Quantification of  $R$  is a function of aquifer bulk density ( $\rho_{bulk}$ ),  $K_P$ , and  $\Phi$  (Equation 35)

$$R = \frac{V_{req}}{V_{unit}} = 1 + \frac{\rho_{bulk} \cdot K_P}{\phi} \quad 37$$

In brief, the removal of DBPs via the adsorption process occurs differently in surface watershed and underground watersheds: one process occurs through settling and the other by prolonging the retention time to allow other mechanisms to degrade the DBPs. However, both processes depend heavily on the partitioning ability of the DBPs, expressed as  $K_P$  or  $K_{ow}$ , and the absorbent concentration (i.e.,  $[SP]$ ). In addition to the environmental factors (such as  $T$ ,  $[SP]$ ,  $f_{oc}$ ,  $\Phi$ , and  $\rho_{solid}$ ), certain hydrogeological parameters including water level height ( $H$ ) and dispersivity ( $D_{disp}$ , from Equation 10) are also critical to the fate and transport of DBPs.

In order to compare the relative importance of different types of mechanisms, a list of reaction rate constants were extracted from earlier studies. The rate of photolysis is subject to adjustment for water depth according to Equation 38<sup>8</sup>.

295

$$296 \quad k_{\text{photolysis}} = k_{\text{surface}} \cdot e^{-k_{\lambda} \cdot H} \quad 38$$

297

298 Where  $k_{\text{photolysis}}$  denotes the solar photolysis rate constant of a DBP at a depth of H (1/hour),  
299  $k_{\text{surface}}$  denotes the photolysis rate constant near the surface of the watershed or at a depth of  
300 zero (1/hour).  $k_{\lambda}$  is a constant with average value of 0.1/cm, and D is the average depth of  
301 watershed (in unit of cm).

302

### 303 **References:**

304

- 305 1. F. M. Dunnivant and E. Anders, *A Basic Introduction to Pollutant Fate and*  
306 *Transport: An Integrated Approach with Chemistry, Modeling, Risk Assessment,*  
307 *and Environmental Legislation*, John Wiley & Sons, Inc., 2006.
- 308 2. R. V. Thomann and J. A. Mueller, *Principles of Surface Water Quality Modeling*  
309 *and Control*, Prentice Hall, 1987.
- 310 3. H. Fischer, J. List, C. Koh, J. Imberger and N. Brooks, *Mixing in inland and coastal*  
311 *waters*, Academic Press, New York :, 1979.
- 312 4. Geophysics-Study-Committee, Geophysics-Research-Forum and  
313 National-Research-Council, *Groundwater Contamination*, The National Academies  
314 Press, 1984.
- 315 5. V. L. Snoeyink, *Water chemistry / Vernon L. Snoeyink, David Jenkins*, Wiley, New  
316 York :, 1980.

- 317 6. USEPA, *User's Guide for Water9 Software (Version 2.0)*, Office of Air Quality  
318 Planning and Standards, Research Triangle Park, North Carolina, 2006.
- 319 7. P. Reichert, *Aquasim2.0 - User Manual*, Swiss Federal Institute for Environmental  
320 Science and Technology (EAWAG), 1998.
- 321 8. R. S. Boethling and D. Mackay, *Handbook of property estimation methods for*  
322 *chemicals environmental and health sciences*, Lewis Publishers, 2000.  
323  
324
